# Supplementary material for: Differential Th Cell-Related Immune Responses in Young Physically Active Men after an Endurance Effort
Source: MDPI journal article supplement (doi:10.3390/jcm9061795), 2020-06-09
Supplement: s1 [file s1]

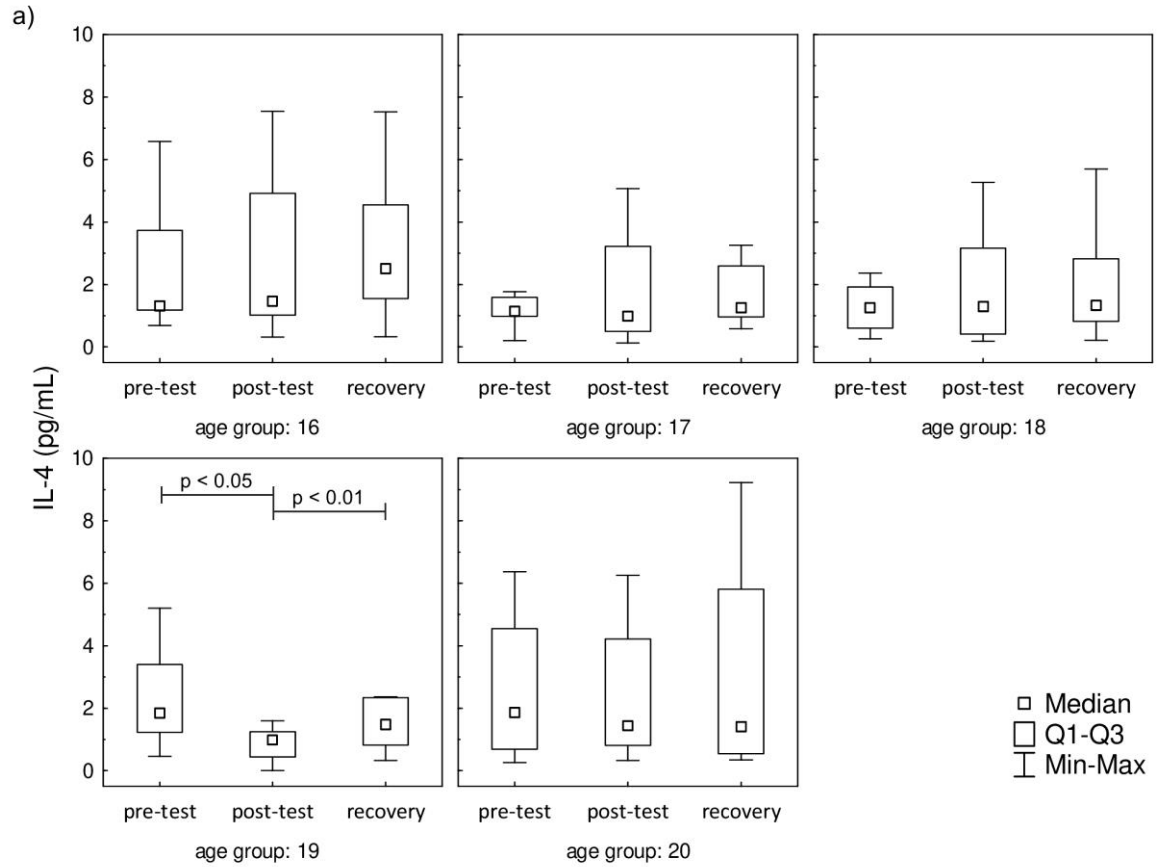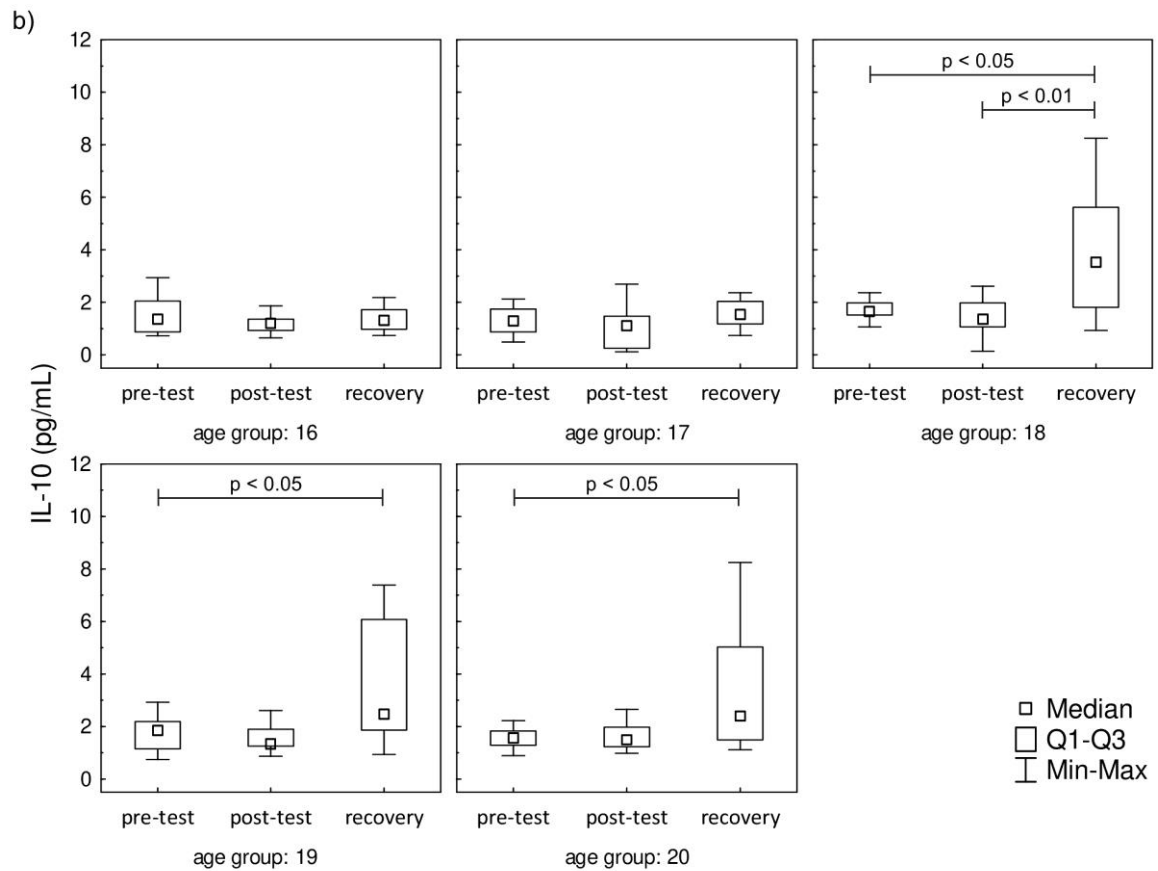

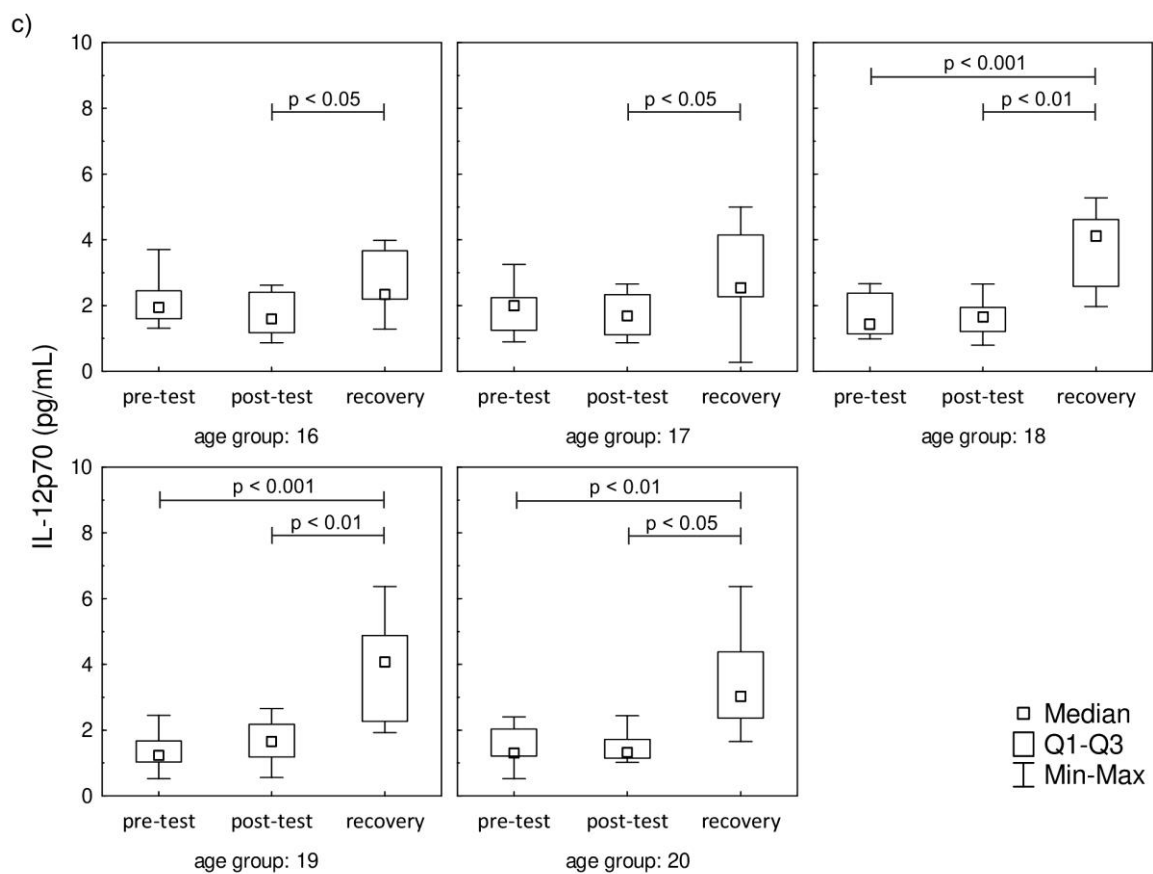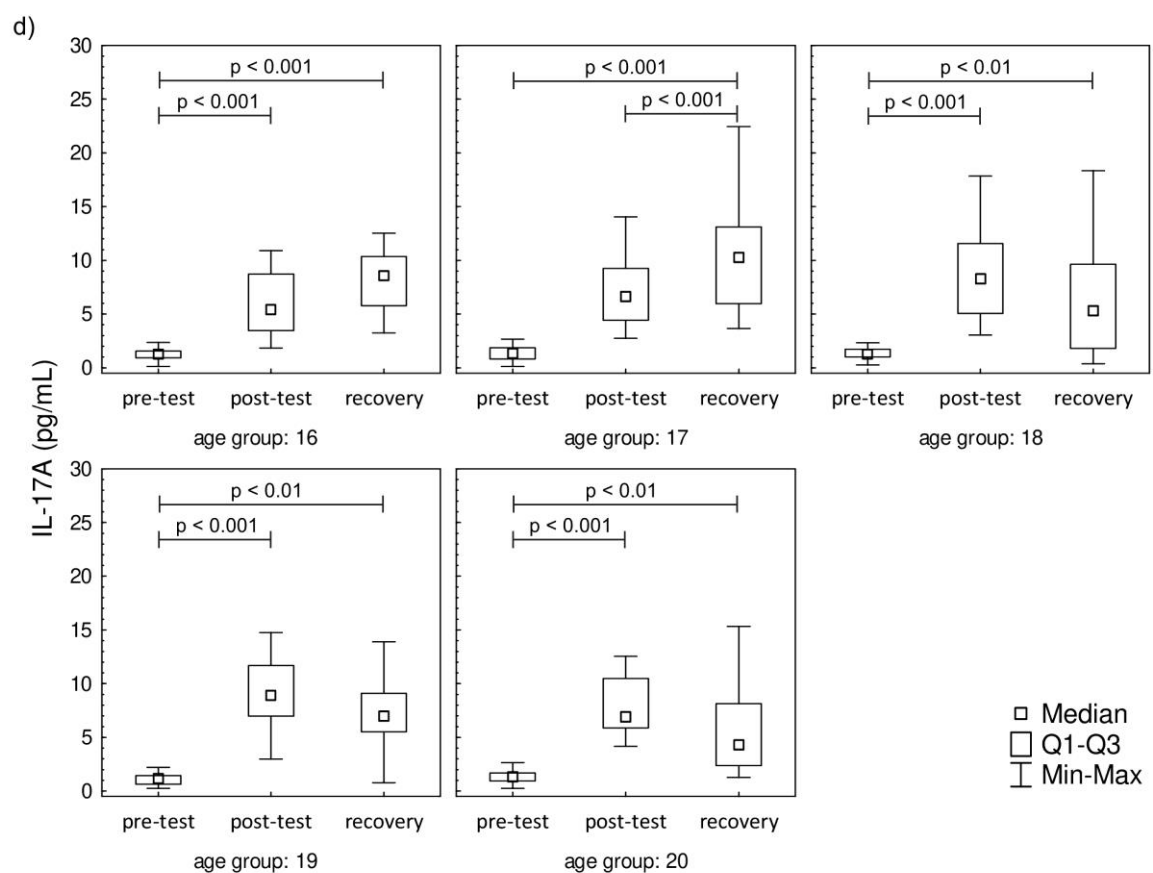

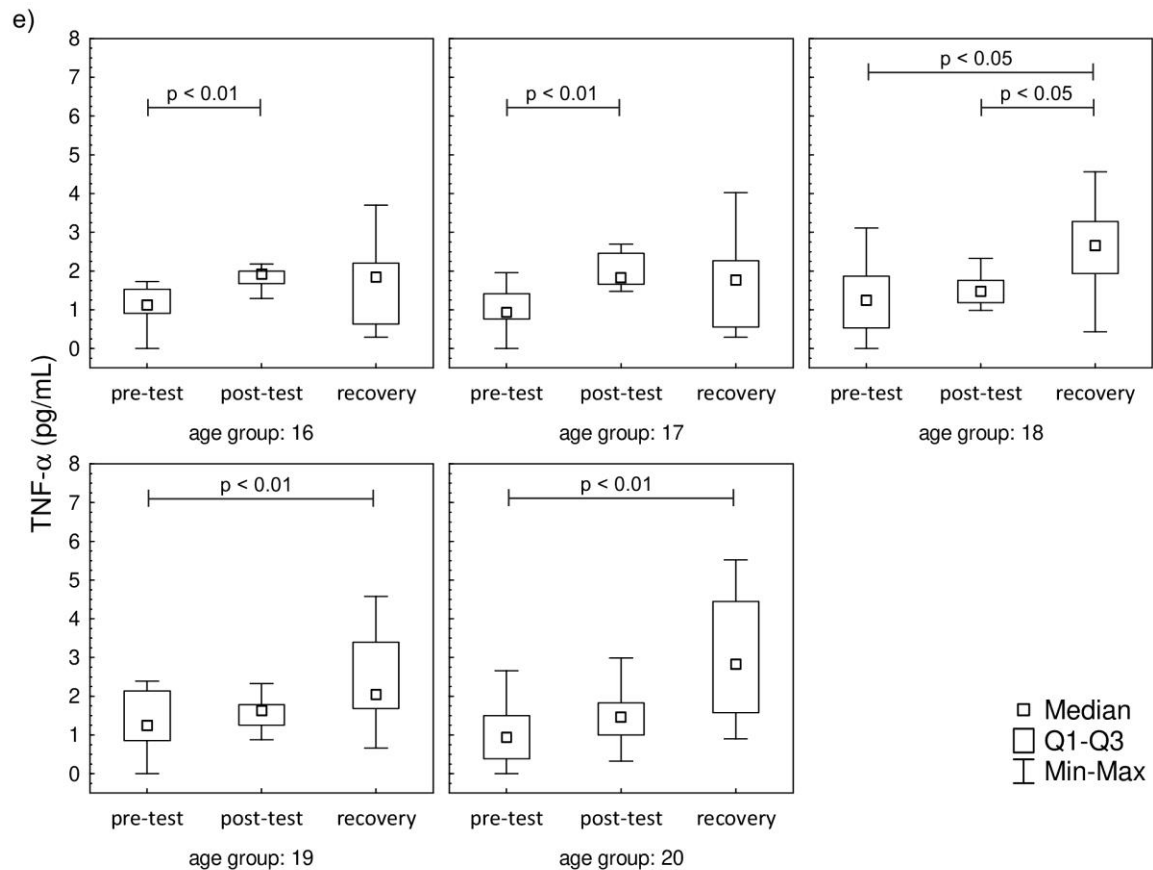

**Figure 1.** Median level of (a) interleukin-4 (IL-4), (b) interleukin-10 (IL-10), (c) interleukin-12p70 (IL-12p70), (d) interleukin-17A (IL-17A) and (e) tumor necrosis factor alpha (TNF- $\alpha$ ) of participants' plasma samples. Significance levels of differences observed between analyzed time points (pre-test vs. post-test vs. recovery) were assessed using Friedman's analysis of variance for repeated measures followed by post-hoc Dunn's test with Bonferroni correction.

**Table 2.** Median level of percentage of lymphocytes, T lymphocytes, Th lymphocytes, Tc lymphocytes, NK cells and B lymphocytes of participants' blood samples.

| Variable                | Time point | 16 years<br>old group<br>(n = 16)  | 17 years<br>old group<br>(n = 16)  | 18 years<br>old group<br>(n = 16)  | 19 years<br>old group<br>(n = 16)  | 20 years<br>old group<br>(n = 16)  |
|-------------------------|------------|------------------------------------|------------------------------------|------------------------------------|------------------------------------|------------------------------------|
| Lymphocytes<br>(%)      | $p_F^1$    | 0.005                              | < 0.001                            | 0.003                              | 0.050                              | 0.003                              |
|                         | pre-test   | 24.6 <sup>aa</sup><br>(19.5–28.3)  | 20.0 <sup>aa</sup><br>(18.7–25.8)  | 16.9 <sup>a</sup> (13.6–<br>19.3)  | 21.3 (18.5–<br>23.1)               | 25.6 (24.1–<br>29.2)               |
|                         | post-test  | 27.6 (25.8–<br>31.4)               | 26.3 <sup>bbb</sup><br>(22.9–31.2) | 19.7 (17.7–<br>23.3)               | 23.2 (19.1–<br>25.6)               | 29.1 <sup>bb</sup><br>(26.1–31.9)  |
|                         | recovery   | 26.7 (21.7–<br>29.0)               | 17.5 (15.9–<br>18.6)               | 20.8 <sup>cc</sup><br>(19.2–24.5)  | 21.1 (18.8–<br>23.4)               | 21.6 (16.5–<br>28.6)               |
|                         | $p_F$      | < 0.001                            | < 0.001                            | < 0.001                            | < 0.001                            | < 0.001                            |
|                         | pre-test   | 66.7 <sup>aa</sup><br>(60.3–73.8)  | 68.3 <sup>a</sup> (64.4–<br>72.9)  | 69.2 (62.9–<br>73.2)               | 64.6 (58.6–<br>71.4)               | 70.9 (62.4–<br>72.4)               |
| T<br>lymphocytes<br>(%) | post-test  | 58.2 <sup>bbb</sup><br>(51.2–65.3) | 59.4 <sup>bbb</sup><br>(53.0–65.9) | 62.8 <sup>bbb</sup><br>(55.5–67.6) | 59.7 <sup>bbb</sup><br>(51.4–67.6) | 63.3 <sup>bbb</sup><br>(58.6–71.3) |
|                         | recovery   | 71.1 (63.9–<br>76.9)               | 71.3 (66.8–<br>74.1)               | 72.0 <sup>cc</sup><br>(66.8–77.9)  | 71.4 <sup>c</sup> (66.0–<br>77.5)  | 72.1 (66.4–<br>76.8)               |
|                         | $p_F$      | < 0.001                            | < 0.001                            | < 0.001                            | < 0.001                            | < 0.001                            |

|                    |                |                                    |                                    |                                    |                                    |                                 |
|--------------------|----------------|------------------------------------|------------------------------------|------------------------------------|------------------------------------|---------------------------------|
| Th lymphocytes (%) | pre-test       | 54.5 <sup>aa</sup><br>(45.4–61.4)  | 54.7 <sup>aa</sup><br>(50.5–60.0)  | 52.5 <sup>aa</sup><br>(43.0–61.8)  | 53.2 <sup>aa</sup><br>(45.8–62.4)  | 55.3 <sup>a</sup> (46.3–59.3)   |
|                    | post-test      | 45.8 <sup>bbb</sup><br>(43.2–53.7) | 50.7 <sup>bbb</sup><br>(43.9–56.7) | 45.4 <sup>bbb</sup><br>(36.6–53.9) | 45.9 <sup>bbb</sup><br>(38.1–58.7) | 47.0 <sup>bbb</sup> (42.1–53.4) |
|                    | recovery       | 56.3 (51.9–61.5)                   | 56.3 (49.6–64.4)                   | 55.4 (44.2–62.2)                   | 59.0 (50.0–65.6)                   | 57.7 (51.2–60.9)                |
|                    | p <sub>F</sub> | < 0.001                            | 0.003                              | 0.002                              | 0.002                              | < 0.001                         |
| Tc lymphocytes (%) | pre-test       | 33.9 (27.8–43.6)                   | 34.0 (29.4–41.0)                   | 36.2 (32.2–42.6)                   | 34.1 (29.7–44.6)                   | 35.6 <sup>a</sup> (32.3–41.4)   |
|                    | post-test      | 39.4 <sup>bbb</sup><br>(32.9–48.2) | 35.5 <sup>bb</sup><br>(32.9–42.0)  | 40.6 <sup>bb</sup><br>(36.0–44.5)  | 37.7 <sup>bb</sup><br>(31.6–46.9)  | 38.5 <sup>bbb</sup> (36.9–44.2) |
|                    | recovery       | 33.6 (28.2–41.4)                   | 32.1 (26.6–40.5)                   | 35.6 (31.3–41.2)                   | 33.6 (27.2–38.1)                   | 34.6 (31.4–37.8)                |
|                    | p <sub>F</sub> | < 0.001                            | < 0.001                            | < 0.001                            | < 0.001                            | < 0.001                         |
| NK cells (%)       | pre-test       | 18.8 <sup>aa</sup><br>(12.6–25.1)  | 18.2 <sup>aa</sup><br>(16.0–22.7)  | 16.8 <sup>a</sup> (13.9–21.3)      | 18.8 <sup>aa</sup><br>(16.5–25.2)  | 18.0 (13.6–24.6)                |
|                    | post-test      | 30.9 <sup>bbb</sup><br>(20.1–35.8) | 27.6 <sup>bbb</sup><br>(21.2–33.8) | 27.1 <sup>bbb</sup><br>(19.5–31.6) | 27.2 <sup>bbb</sup><br>(19.9–32.7) | 24.3 <sup>bbb</sup> (16.9–26.9) |
|                    | recovery       | 14.6 <sup>c</sup> (8.5–20.5)       | 11.3 (10.2–16.4)                   | 13.1 <sup>c</sup> (10.5–15.6)      | 13.0 (9.7–19.8)                    | 11.1 <sup>c</sup> (8.3–18.2)    |
|                    | p <sub>F</sub> | 0.002                              | 0.019                              | < 0.001                            | 0.018                              | 0.003                           |
| B lymphocytes (%)  | pre-test       | 11.4 <sup>a</sup> (8.6–14.2)       | 10.2 (7.7–12.2)                    | 11.0 <sup>aa</sup> (9.2–12.7)      | 9.9 (9.0–11.9)                     | 10.6 (9.4–13.2)                 |
|                    | post-test      | 9.5 <sup>bb</sup> (7.4–12.9)       | 8.7 <sup>b</sup> (7.2–10.7)        | 8.7 <sup>bbb</sup> (7.2–10.8)      | 8.8 <sup>b</sup> (7.9–10.9)        | 9.2 <sup>bb</sup> (7.4–10.5)    |
|                    | recovery       | 11.7 (10.0–14.3)                   | 11.6 (8.7–14.0)                    | 11.6 (9.9–14.3)                    | 11.3 (10.2–14.3)                   | 12.9 (12.0–14.1)                |

<sup>1</sup> Significance levels of differences observed between analyzed time points (pre-test vs. post-test vs. recovery) were assessed using Friedman's analysis of variance for repeated measures (p<sub>F</sub> - Friedman's ANOVA p values) followed by post-hoc Dunn's test with Bonferroni correction. Post-hoc p values: <sup>a</sup> p < 0.05, <sup>aa</sup> p < 0.01 for pre-test vs. post-test; <sup>b</sup> p < 0.05, <sup>bb</sup> p < 0.01, <sup>bbb</sup> p < 0.001 for post-test vs. recovery; <sup>c</sup> p < 0.05, <sup>cc</sup> p < 0.01 for pre-test vs. recovery. n – number of participants. Whole blood lymphocyte subsets were determined using a BD Multitest™ IMK kit (BD Biosciences, San Jose, CA, USA). The expression of surface markers was determined according to the manufacturer's protocol. Briefly, an antibody cocktail was used to determine the percentage of T-lymphocyte subsets in erythrocyte-lysed blood samples. The cocktail contained antibodies including fluorescein isothiocyanate (FITC)-labelled anti-CD3, clone SK7; phycoerythrin (PE)-labelled anti-CD8, clone SK1; peridinin chlorophyll protein (PerCP)-labelled anti-CD45, clone 2D1 (HLe-1) and allophycocyanin (APC)-labelled anti-CD4. For each sample, the fluorescence signal of at least 10<sup>4</sup> total events were measured.

**Table 3.** Linear regression parameters for age effects.

| Variable analyzed     | Time point | Linear regression equation               | R value | R <sup>2</sup> value | p value |
|-----------------------|------------|------------------------------------------|---------|----------------------|---------|
| Th1 cells (%)         | pre-test   | $Th1 = 0.408 \times age + 10.532$        | 0.135   | 0.018                | 0.232   |
|                       | post-test  | $Th1 = 0.456 \times age + 16.118$        | 0.138   | 0.019                | 0.221   |
|                       | recovery   | $Th1 = 0.575 \times age + 15.488$        | 0.161   | 0.026                | 0.154   |
| Th2 cells (%)         | pre-test   | $Th2 = -0.694 \times age + 24.378$       | -0.257  | 0.066                | 0.021   |
|                       | post-test  | $Th2 = -0.702 \times age + 25.899$       | -0.325  | 0.106                | 0.003   |
|                       | recovery   | $Th2 = -0.228 \times age + 18.169$       | -0.101  | 0.010                | 0.371   |
| Th17 cells (%)        | pre-test   | $Th17 = 0.221 \times age + 14.267$       | 0.056   | 0.003                | 0.624   |
|                       | post-test  | $Th17 = 0.368 \times age + 18.205$       | 0.144   | 0.021                | 0.202   |
|                       | recovery   | $Th17 = -0.300 \times age + 31.988$      | 0.069   | 0.005                | 0.543   |
| Treg cells (%)        | pre-test   | $Treg = -0.022 \times age + 4.995$       | 0.019   | < 0.001              | 0.864   |
|                       | post-test  | $Treg = -0.219 \times age + 8.696$       | 0.160   | 0.026                | 0.155   |
|                       | recovery   | $Treg = 0.1332 \times age + 8.838$       | 0.043   | 0.002                | 0.707   |
| IL-2 (pg/mL)          | pre-test   | $IL-2 = -0.237 \times age + 7.155$       | 0.170   | 0.029                | 0.132   |
|                       | post-test  | $IL-2 = 0.694 \times age - 2.983$        | 0.230   | 0.053                | 0.040   |
|                       | recovery   | $IL-2 = -0.702 \times age + 21.526$      | 0.229   | 0.052                | 0.041   |
| IL-4 (pg/mL)          | pre-test   | $IL-4 = 0.081 \times age + 0.591$        | 0.068   | 0.005                | 0.548   |
|                       | post-test  | $IL-4 = -0.214 \times age + 5.953$       | 0.140   | 0.020                | 0.216   |
|                       | recovery   | $IL-4 = -0.020 \times age + 2.913$       | 0.012   | < 0.001              | 0.917   |
| IL-6 (pg/mL)          | pre-test   | $IL-6 = 0.034 \times age + 1.164$        | 0.056   | 0.003                | 0.622   |
|                       | post-test  | $IL-6 = -0.482 \times age + 12.498$      | 0.261   | 0.068                | 0.019   |
|                       | recovery   | $IL-6 = -1.198 \times age + 31.320$      | 0.265   | 0.070                | 0.017   |
| IL-8 (pg/mL)          | pre-test   | $IL-8 = -0.061 \times age + 5.112$       | 0.043   | 0.002                | 0.706   |
|                       | post-test  | $IL-8 = -0.500 \times age + 17.979$      | 0.157   | 0.025                | 0.164   |
|                       | recovery   | $IL-8 = -1.348 \times age + 34.122$      | 0.372   | 0.138                | < 0.001 |
| IL-10 (pg/mL)         | pre-test   | $IL-10 = 0.060 \times age + 0.487$       | 0.153   | 0.023                | 0.174   |
|                       | post-test  | $IL-10 = 0.116 \times age - 0.678$       | 0.251   | 0.063                | 0.025   |
|                       | recovery   | $IL-10 = 0.603 \times age - 8.043$       | 0.413   | 0.170                | < 0.001 |
| IL-12p70 (pg/mL)      | pre-test   | $IL-12p70 = -0.135 \times age + 4.175$   | 0.281   | 0.079                | 0.011   |
|                       | post-test  | $IL-12p70 = -0.045 \times age + 2.482$   | 0.109   | 0.012                | 0.334   |
|                       | recovery   | $IL-12p70 = 0.230 \times age - 0.816$    | 0.251   | 0.063                | 0.025   |
| IL-17A (pg/mL)        | pre-test   | $IL-17A = 0.001 \times age + 1.231$      | 0.003   | < 0.001              | 0.975   |
|                       | post-test  | $IL-17A = 0.574 \times age - 2.532$      | 0.227   | 0.051                | 0.043   |
|                       | recovery   | $IL-17A = -0.765 \times age + 21.319$    | 0.252   | 0.063                | 0.024   |
| TNF- $\alpha$ (pg/mL) | pre-test   | $TNF-\alpha = -0.010 \times age + 1.370$ | 0.018   | < 0.001              | 0.975   |
|                       | post-test  | $TNF-\alpha = -0.124 \times age + 3.940$ | 0.313   | 0.098                | 0.005   |
|                       | recovery   | $TNF-\alpha = 0.319 \times age - 3.394$  | 0.306   | 0.094                | 0.006   |
| INF- $\gamma$ (pg/mL) | pre-test   | $INF-\gamma = -0.200 \times age + 2.730$ | 0.027   | < 0.001              | 0.810   |
|                       | post-test  | $INF-\gamma = 0.516 \times age + 0.824$  | 0.150   | 0.022                | 0.185   |
|                       | recovery   | $INF-\gamma = 0.165 \times age + 9.900$  | 0.060   | 0.003                | 0.598   |

The regression analysis was performed using STATISTICA (data analysis software system), version 13 software (2017; TIBCO Software Inc., Palo Alto, CA, USA; <http://statistica.io>).
